# Supplementary material for: Monitoring and Surveillance of Aerial Mycobiota of Rice Paddy through DNA Metabarcoding and qPCR
Source: PubMed Central journal article supplement (PMC7766667; doi:10.3390/jof6040372), 2020-12-17
Supplement: jof-06-00372-s001.pdf [file jof-06-00372-s001.pdf]

Article

# Monitoring and surveillance of aerial mycobiota of rice paddy through DNA metabarcoding and qPCR

Supplementary Materials:

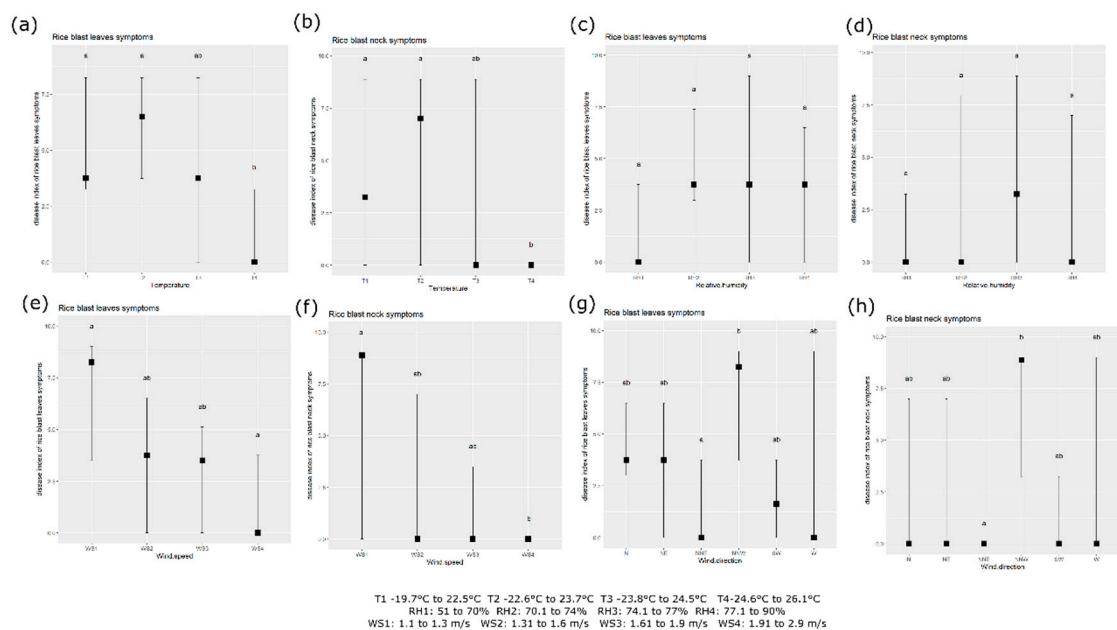

**Figure S1.** Representation of the leaves (a, c, e, g) and neck (b, d, f, h) blast symptoms index and the weather data. A and B. Kruskal-Wallis rank sum with Dunn test of the groups determined by the temperature quartiles. C and D: Kruskal-Wallis rank sum with Dunn of the groups determined by the relative abundance quartiles. E and F: Kruskal-Wallis rank sum with Dunn of the groups determined by the wind speed quartiles. G and H Kruskal-Wallis rank sum with Dunn of the groups determined by the wind direction.

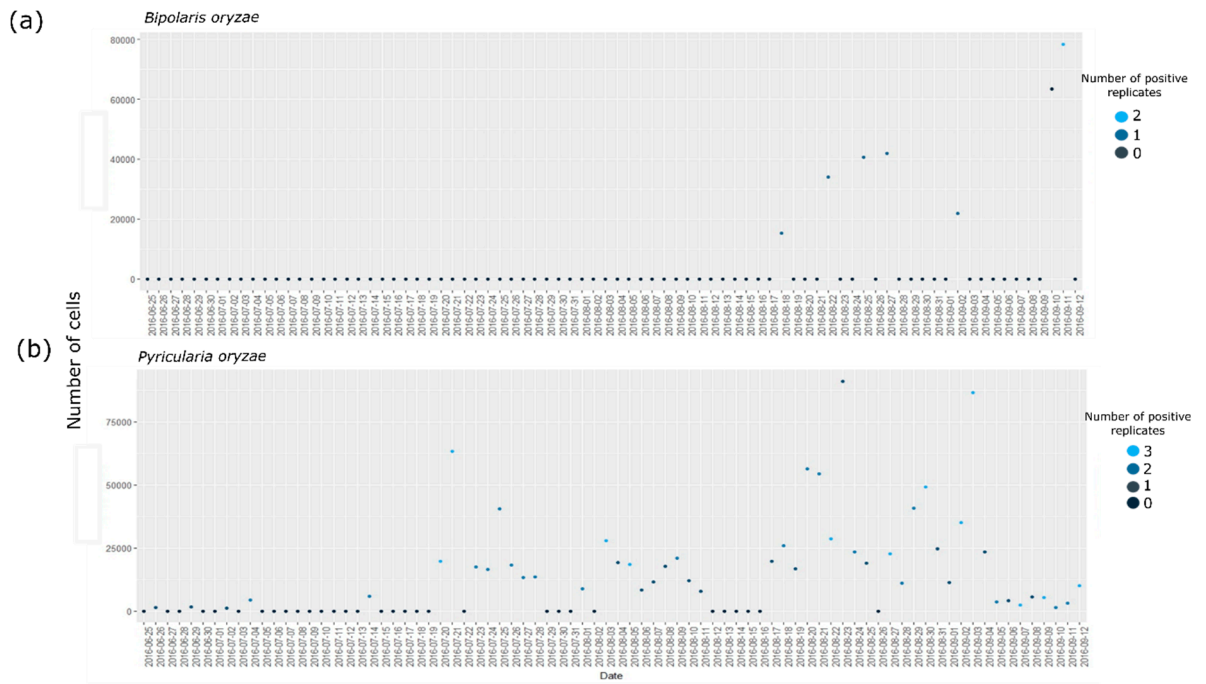

**Figure S2.** Number of cells of *Bipolaris oryzae* (a) and *Pyricularia oryzae* (b) present among the trial calculated according the Ct of the qPCR assays.



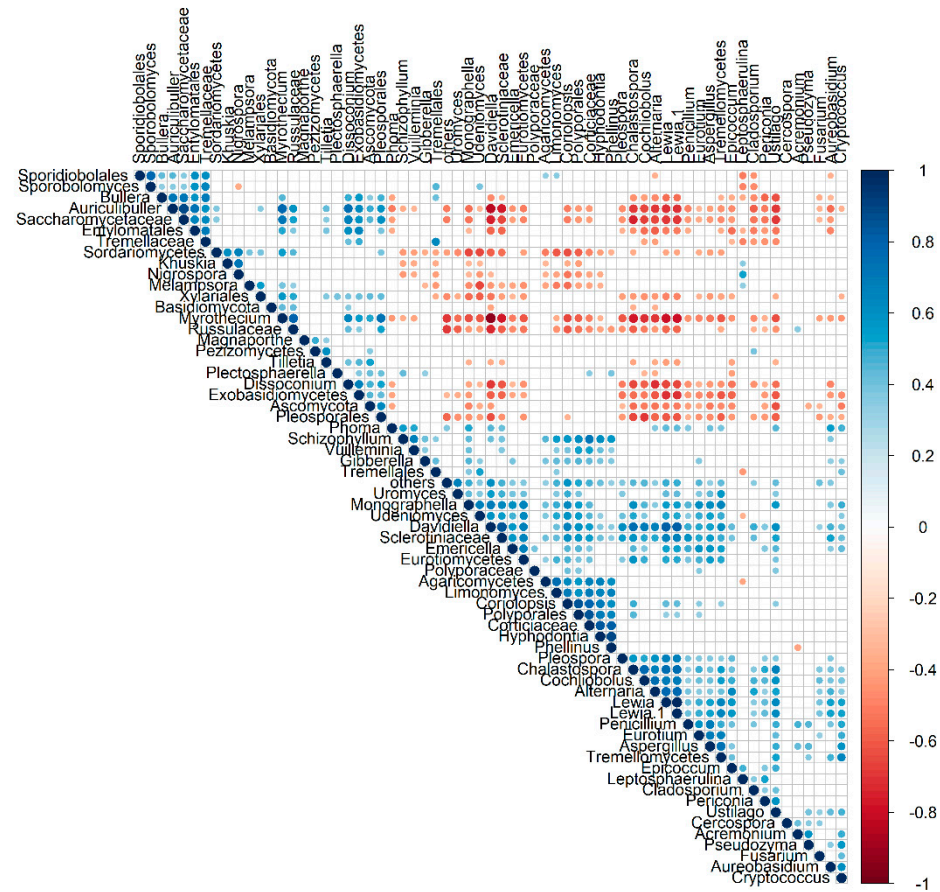

**Figure S4.** Significant co-occurrence and co-exclusion relationships between species. Spearman’s rank correlation matrix of the genera identified with > 0.2% abundance in at least 20 samples. The plots only represent significant differences FDR < 0.01. Strong correlations are indicated by large circles, whereas weak correlations are indicated by small squares. The colour of the scale bar denotes the nature of the correlation, with 1 indicating perfectly positive correlation (dark blue) and -1 indicating a perfectly negative correlation (dark red).

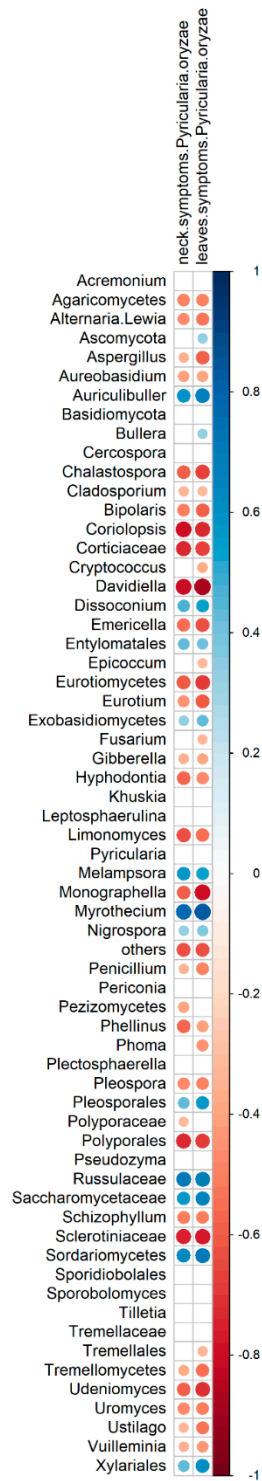

**Figure S5.** Significant correlation between OTUs and the *Pyricularia* leaves and neck symptoms using Spearman’s rank correlation matrix of the genera identified with > 0.2% abundance in at least 20 samples. The plots only represent significant differences FDR < 0.01. Strong correlations are indicated by large circles, whereas weak correlations are indicated by small circles. The colour of the scale bar denotes the nature of the correlation, with 1 indicating perfectly positive correlation (dark blue) and -1 indicating a perfectly negative correlation (dark red).

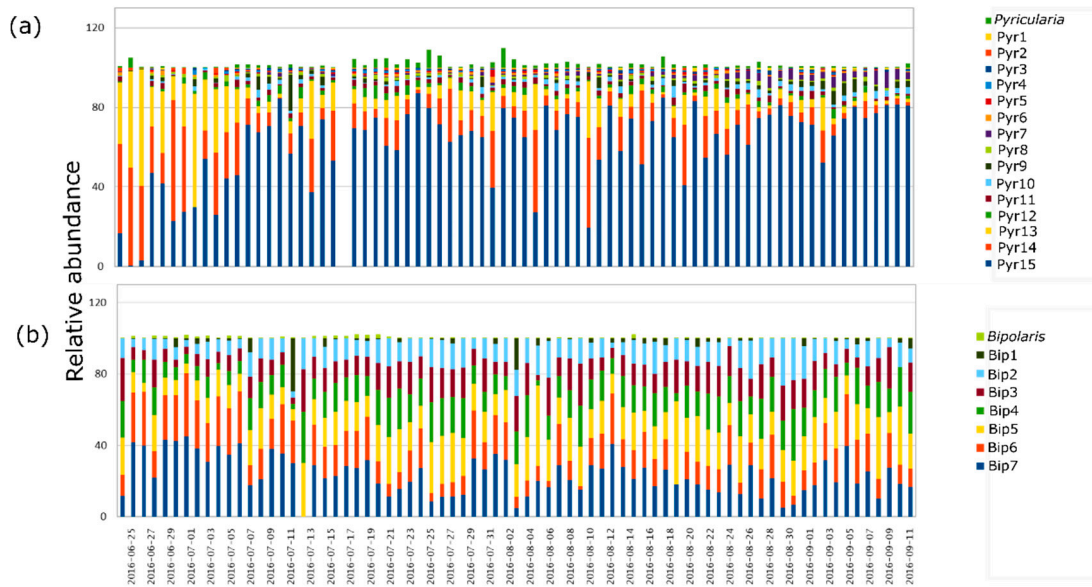

Figure S6. Distribution of the oligotypes of *Pyricularia* (a) and *Bipolaris* (b) over time.

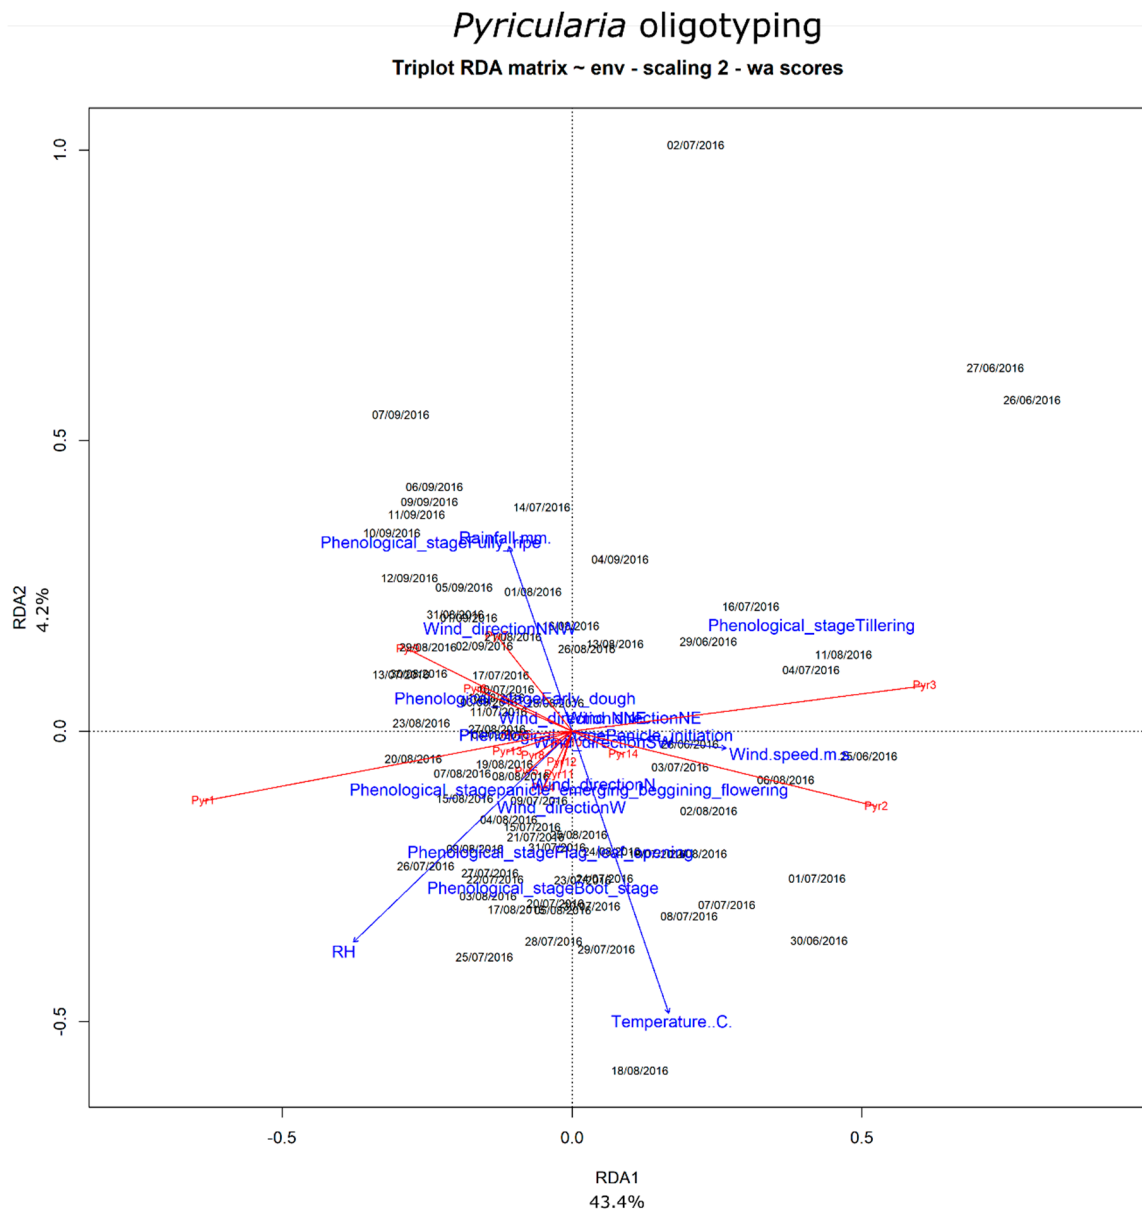

Figure S7. Redundancy Analysis (RDA) representing the Axis 1 and 2 among the *Pyricularia*

oligotypes and the weather data and phenological stages. Proportion explained by two first constrained ordinations are reported as percentages in the axes.

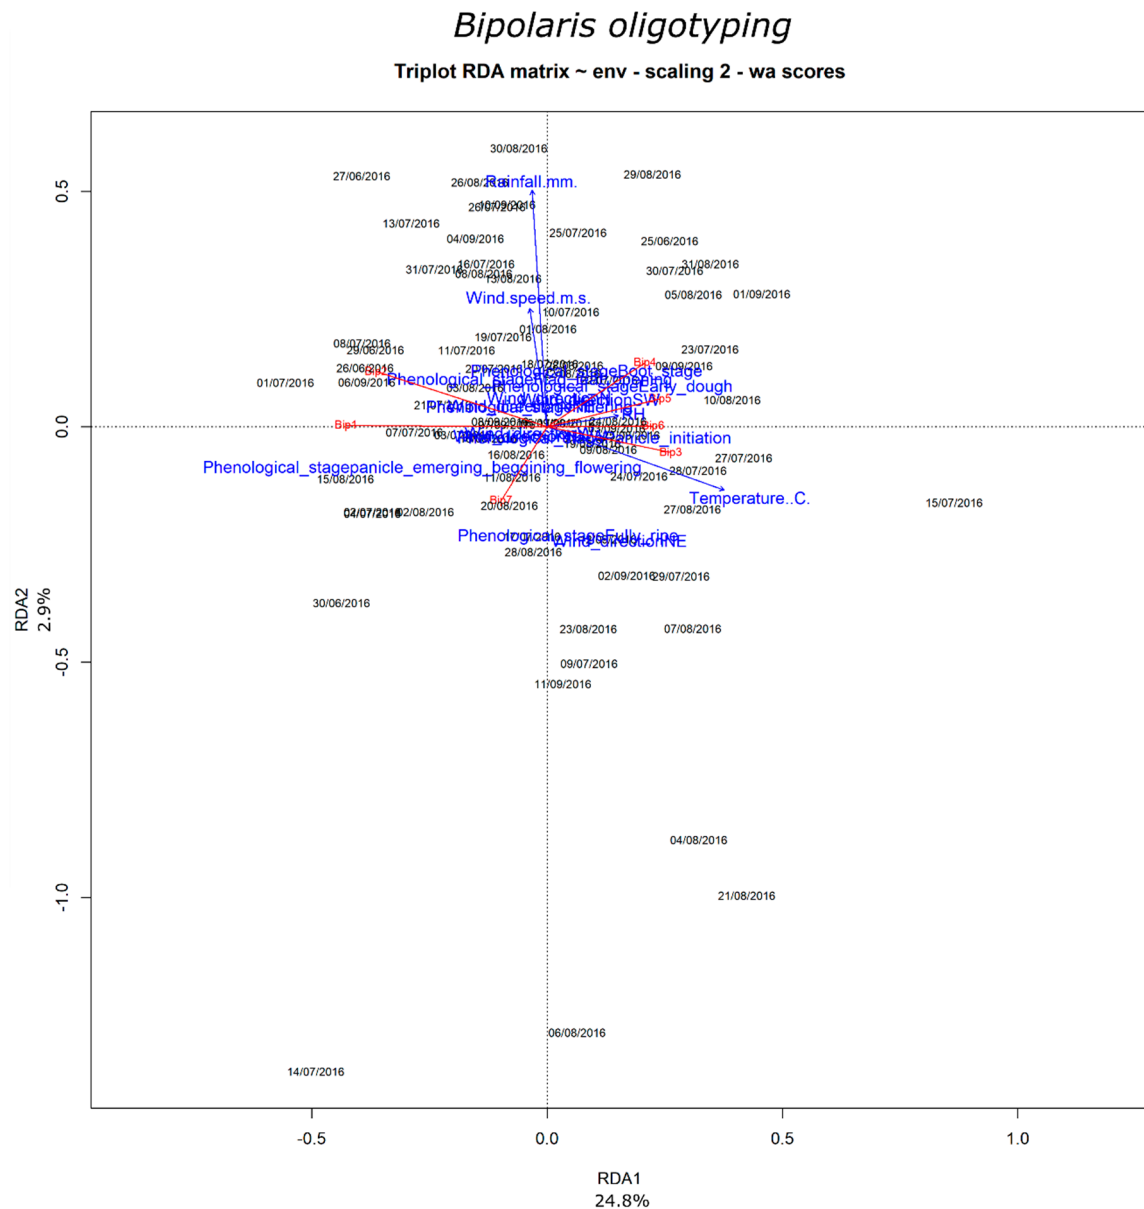

**Figure S8.** Redundancy Analysis (RDA) representing the Axis 1 and 2 among the *Bipolaris* oligotypes and the weather data and phenological stages. Proportion explained by two first constrained ordinations are reported as percentages in the axes.

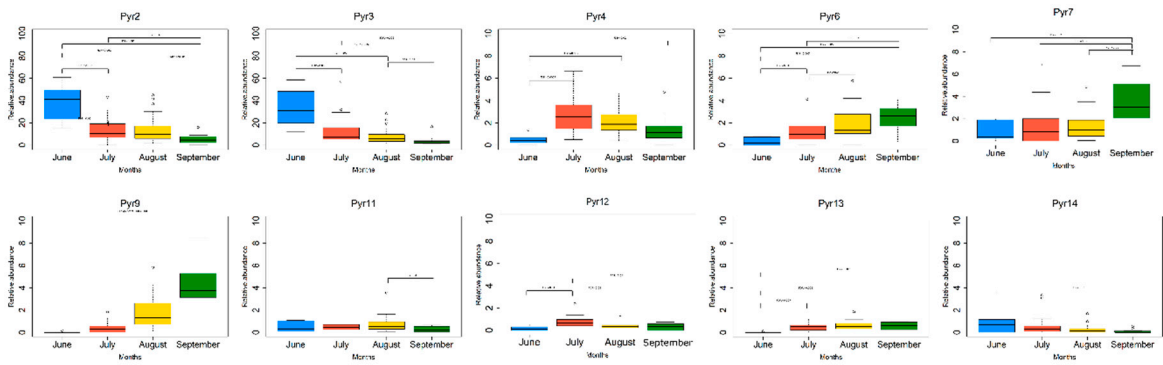

**Figure S9.** Abundance (%) of *Pyricularia* oligotypes significantly different (FDR < 0.05) among the sampling month (June, July, August and September).



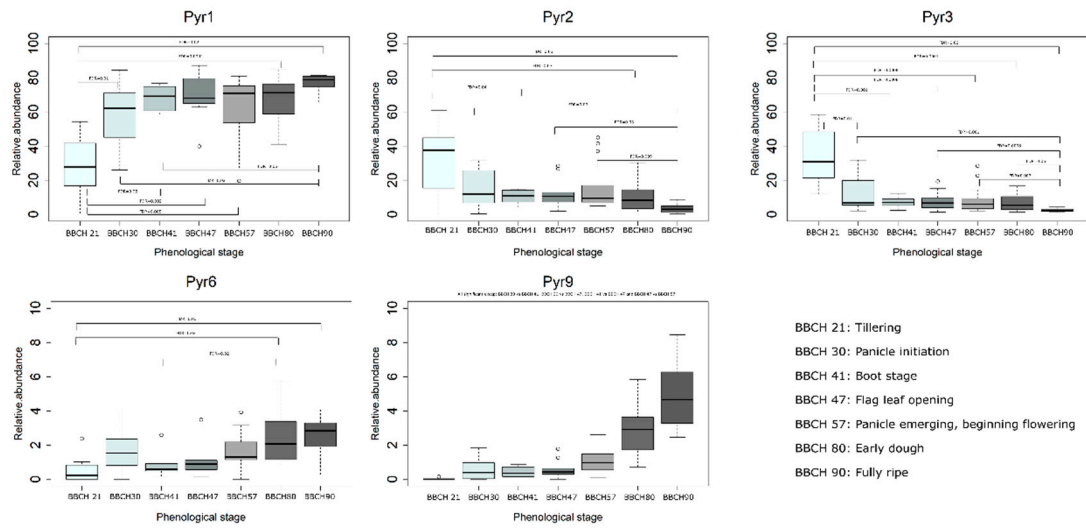

**Figure S10.** Abundance (%) of *Pyricularia* oligotypes significantly different (FDR < 0.05) among the growth stages (BBCH 21: tillering; BBCH 30: panicle initiation; BBCH 41: boot stage; BBCH 47: leaf opening; BBCH 57: panicle emerging; BBCH 80: early dough; and BBCH 90: fully ripening).

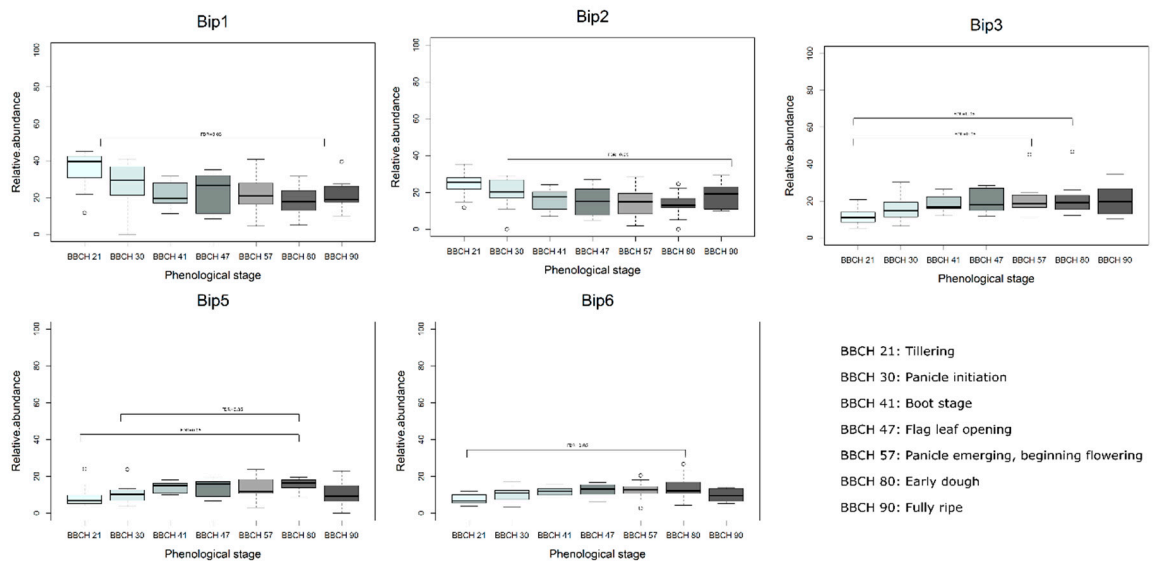

**Figure S11.** Abundance (%) of *Bipolaris* oligotypes significantly different (FDR < 0.05) among the growth stages (BBCH 21: tillering; BBCH 30: panicle initiation; BBCH 41: boot stage; BBCH 47: leaf opening; BBCH 57: panicle emerging; BBCH 80: early dough; and BBCH 90: fully ripening).

**Table S1.** Growth stages of the rice paddy during the trial.

| DATA        | PHENOLOGICAL STAGE | IDENTIFICATION KEYS OF RICE                                                                                                                                                                                                    |
|-------------|--------------------|--------------------------------------------------------------------------------------------------------------------------------------------------------------------------------------------------------------------------------|
| 07/05/2016  | Sowing in water    |                                                                                                                                                                                                                                |
| 14/05/2016  | BBCH:10-11         | Imperfect leaf unrolled, tip of first true leaf visible- First leaf unfolded                                                                                                                                                   |
| 30/05/2016  | BBCH:13-14         | 3 leaves unfolded                                                                                                                                                                                                              |
| 14/06/2016  | BBCH:21            | Beginning of tillering: first tiller detectable                                                                                                                                                                                |
| 21/06/2016  | BBCH:22-23         | 2-3 tillers detectable                                                                                                                                                                                                         |
| 05/07/2016/ | BBCH:30-34         | Panicle initiation or green ring stage: chlorophyll accumulates in the stem tissue, forming a green ring-Internode elongation or jointing stage: internodes begin to elongate, panicle more than 2 mm long (variety-dependent) |
| 19/07/2016  | BBCH:41            | Early boot stage: upper part of stem slightly thickened, sheath of flag leaf about 5 cm out of penultimate leaf sheath                                                                                                         |
| 26/07/2016  | BBCH:47-49         | Flag leaf sheath opening-open                                                                                                                                                                                                  |
| 04/08/2016  | BBCH:57-61         | 70% of panicle emerged- Beginning of flowering: anthers visible at top of panicle                                                                                                                                              |
| 20/08/2016  | BBCH:80            | Early dough                                                                                                                                                                                                                    |
| 05/09/2016  | BBCH:90            | Fully ripe: grain hard, difficult to divide with thumbnail                                                                                                                                                                     |

Table S2. Meteorological conditions during the trial in the rice paddy.

| <i>Date</i> | <i>Rainfall<br/>(mm)</i> | <i>Temperature<br/>(°C)</i> | <i>Relative Humidity<br/>(%)</i> | <i>Wind Speed<br/>(m/s)</i> | <i>Wind<br/>Direction</i> |
|-------------|--------------------------|-----------------------------|----------------------------------|-----------------------------|---------------------------|
| 25/06/2016  | 0                        | 24.3                        | 73                               | 2.8                         | NNE                       |
| 26/06/2016  | 0                        | 24.4                        | 71                               | 1.9                         | NE                        |
| 27/06/2016  | 0                        | 24                          | 66                               | 1.6                         | N                         |
| 28/06/2016  | 0                        | 23.6                        | 69                               | 2.0                         | NNE                       |
| 29/06/2016  | 0                        | 24.8                        | 67                               | 2.0                         | NNE                       |
| 30/06/2016  | 0.2                      | 24.5                        | 76                               | 1.6                         | W                         |
| 01/07/2016  | 0.4                      | 25                          | 71                               | 1.3                         | N                         |
| 02/07/2016  | 0                        | 23.8                        | 81                               | 1.8                         | NNE                       |
| 03/07/2016  | 11.4                     | 25.1                        | 75                               | 1.2                         | N                         |
| 04/07/2016  | 0                        | 23.3                        | 74                               | 2.2                         | NE                        |
| 07/07/2016  | 0                        | 25.1                        | 77                               | 1.7                         | N                         |
| 08/07/2016  | 0                        | 26.1                        | 74                               | 2.1                         | NE                        |
| 09/07/2016  | 0                        | 27.7                        | 69                               | 1.2                         | SW                        |
| 10/07/2016  | 0                        | 27.5                        | 72                               | 1.7                         | NNE                       |
| 11/07/2016  | 0                        | 26.1                        | 78                               | 2.2                         | NNE                       |
| 13/07/2016  | 13.6                     | 21.8                        | 78                               | 2.4                         | N                         |
| 14/07/2016  | 15.2                     | 19.7                        | 63                               | 2.5                         | NNW                       |
| 15/07/2016  | 0.4                      | 20.3                        | 51                               | 2.9                         | NNE                       |
| 16/07/2016  | 0                        | 21.9                        | 59                               | 1.6                         | SW                        |
| 17/07/2016  | 0                        | 22.8                        | 68                               | 1.8                         | NNE                       |
| 18/07/2016  | 0                        | 24.6                        | 68                               | 1.5                         | NNW                       |
| 19/07/2016  | 0                        | 25.0                        | 72                               | 1.2                         | N                         |
| 20/07/2016  | 0                        | 26.7                        | 70                               | 1.6                         | N                         |
| 21/07/2016  | 0                        | 26.0                        | 69                               | 1.6                         | NNE                       |
| 22/07/2016  | 0.6                      | 22.5                        | 88                               | 2.0                         | N                         |
| 23/07/2016  | 2.2                      | 21.5                        | 88                               | 1.9                         | W                         |
| 24/07/2016  | 0.2                      | 24.1                        | 76                               | 1.2                         | W                         |

|            |      |      |    |     |     |
|------------|------|------|----|-----|-----|
| 25/07/2016 | 0    | 25.1 | 78 | 1.2 | W   |
| 26/07/2016 | 0    | 26.4 | 72 | 2.1 | NNE |
| 27/07/2016 | 0    | 24.1 | 79 | 2.2 | N   |
| 28/07/2016 | 0.6  | 24.5 | 74 | 1.3 | SW  |
| 29/07/2016 | 0    | 25.1 | 76 | 1.7 | N   |
| 30/07/2016 | 0    | 26.3 | 74 | 1.4 | N   |
| 31/07/2016 | 0    | 23.0 | 87 | 2.1 | NNE |
| 01/08/2016 | 19.6 | 24.0 | 78 | 1.7 | NE  |
| 01/08/2016 | 19.6 | 24.0 | 78 | 1.7 | NE  |
| 02/08/2016 | 0    | 23.8 | 74 | 1.8 | NNE |
| 03/08/2016 | 0    | 24.4 | 81 | 1.4 | N   |
| 04/08/2016 | 0    | 25.1 | 77 | 2.0 | NE  |
| 05/08/2016 | 2    | 21.1 | 81 | 2.2 | NNE |
| 06/08/2016 | 1    | 22.3 | 68 | 1.5 | N   |
| 07/08/2016 | 0    | 22.1 | 71 | 1.5 | N   |
| 08/08/2016 | 0    | 22.9 | 71 | 1.3 | NNW |
| 09/08/2016 | 0    | 23.0 | 77 | 1.8 | NNE |
| 09/08/2016 | 0    | 23.0 | 77 | 1.8 | NNE |
| 10/08/2016 | 3.8  | 22.2 | 65 | 1.8 | NNE |
| 11/08/2016 | 4.4  | 19.9 | 66 | 1.8 | N   |
| 13/08/2016 | 0    | 21.2 | 75 | 1.3 | NNW |
| 15/08/2016 | 0    | 24.5 | 72 | 1.4 | N   |
| 16/08/2016 | 0    | 25.0 | 69 | 1.6 | SW  |
| 17/08/2016 | 0    | 23.7 | 74 | 1.3 | N   |
| 18/08/2016 | 0    | 23.6 | 76 | 1.6 | N   |
| 19/08/2016 | 0    | 23.3 | 79 | 1.7 | NE  |
| 20/08/2016 | 0    | 22.4 | 91 | 1.8 | NE  |
| 21/08/2016 | 11   | 23.4 | 76 | 1.6 | NNE |
| 22/08/2016 | 0    | 21.1 | 66 | 1.9 | NNW |

|            |     |      |    |     |     |
|------------|-----|------|----|-----|-----|
| 23/08/2016 | 0   | 21.3 | 73 | 1.3 | NNW |
| 24/08/2016 | 0   | 22.2 | 73 | 1.3 | N   |
| 25/08/2016 | 0   | 23.7 | 72 | 1.4 | NE  |
| 26/08/2016 | 0   | 23.6 | 74 | 1.3 | NNW |
| 27/08/2016 | 0   | 23.6 | 74 | 1.3 | NNW |
| 27/08/2016 | 0   | 23.4 | 73 | 1.5 | NNW |
| 28/08/2016 | 0   | 24.5 | 72 | 1.4 | N   |
| 29/08/2016 | 0   | 24.6 | 75 | 1.4 | NNW |
| 30/08/2016 | 3.4 | 21.3 | 87 | 2.2 | N   |
| 31/08/2016 | 2   | 23.1 | 78 | 1.3 | NNW |
| 01/09/2016 | 0   | 23.9 | 75 | 1.1 | W   |
| 02/09/2016 | 0   | 23.8 | 77 | 1.3 | N   |
| 03/09/2016 | 0   | 23.9 | 78 | 1.2 | N   |
| 04/09/2016 | 0   | 23.8 | 79 | 1.2 | N   |
| 05/09/2016 | 0   | 23.4 | 70 | 1.6 | NNE |
| 06/09/2016 | 0   | 22.5 | 62 | 2.2 | NNW |
| 07/09/2016 | 0   | 21.2 | 68 | 1.8 | NNW |
| 08/09/2016 | 0   | 22.3 | 70 | 1.3 | N   |
| 09/09/2016 | 0   | 22.5 | 74 | 1.2 | NNW |
| 10/09/2016 | 0   | 23.0 | 70 | 1.3 | NNW |
| 11/09/2016 | 0   | 22.7 | 75 | 1.1 | NNW |
| 12/09/2016 | 0   | 22.8 | 75 | 1.1 | W   |

**Table S3.** Rice blast severity, indicated as disease index from 0 to 9, measured in the field during the cropping season (2016).

|        | 19 <sup>th</sup> July | 26 <sup>th</sup> July | 2 <sup>nd</sup> August | 10 <sup>th</sup> August | 17 <sup>th</sup> August | 23 <sup>rd</sup> August | 30 <sup>th</sup> August |
|--------|-----------------------|-----------------------|------------------------|-------------------------|-------------------------|-------------------------|-------------------------|
| NECK   | 0.0                   | 0.0                   | 0.0                    | 3.2                     | 7.0                     | 8.9                     | 9.0                     |
| LEAVES | 3.0                   | 3.7                   | 4.0                    | 3.2                     | 6.5                     | 8.2                     | 9.0                     |

**Table S4.** Alpha diversity values over time.

| DATE       | MONTH  | SHANNON | CHAO1    | OBSERVED OTUS | GOODS COVERAGE | ESC %  |
|------------|--------|---------|----------|---------------|----------------|--------|
| 25/06/2016 | June   | 5.728   | 1458.127 | 894.000       | 0.974          | 97.423 |
| 26/06/2016 | June   | 5.657   | 1140.546 | 688.000       | 0.981          | 98.082 |
| 27/06/2016 | June   | 6.256   | 1372.420 | 867.333       | 0.977          | 97.724 |
| 28/06/2016 | June   | 5.390   | 1362.449 | 779.667       | 0.977          | 97.691 |
| 29/06/2016 | June   | 5.211   | 1228.353 | 704.000       | 0.979          | 97.916 |
| 30/06/2016 | June   | 5.455   | 1011.506 | 648.667       | 0.983          | 98.255 |
| 01/07/2016 | July   | 4.765   | 1149.141 | 641.333       | 0.980          | 98.020 |
| 02/07/2016 | July   | 5.362   | 1417.719 | 777.000       | 0.976          | 97.564 |
| 03/07/2016 | July   | 5.014   | 1016.376 | 614.333       | 0.983          | 98.300 |
| 04/07/2016 | July   | 4.900   | 1353.234 | 721.333       | 0.976          | 97.624 |
| 07/07/2016 | July   | 4.494   | 1032.670 | 603.667       | 0.982          | 98.234 |
| 08/07/2016 | July   | 5.091   | 1287.180 | 753.000       | 0.977          | 97.737 |
| 09/07/2016 | July   | 5.631   | 949.915  | 560.333       | 0.986          | 98.588 |
| 10/07/2016 | July   | 4.989   | 966.985  | 586.667       | 0.984          | 98.411 |
| 11/07/2016 | July   | 5.132   | 1338.811 | 708.667       | 0.977          | 97.714 |
| 13/07/2016 | July   | 5.402   | 1074.169 | 647.000       | 0.982          | 98.199 |
| 14/07/2016 | July   | 5.255   | 1140.763 | 659.667       | 0.981          | 98.084 |
| 15/07/2016 | July   | 4.734   | 861.833  | 544.000       | 0.986          | 98.648 |
| 16/07/2016 | July   | 5.493   | 1156.065 | 725.333       | 0.982          | 98.178 |
| 17/07/2016 | July   | 5.556   | 963.686  | 597.000       | 0.986          | 98.563 |
| 18/07/2016 | July   | 5.304   | 1140.787 | 651.667       | 0.980          | 97.970 |
| 19/07/2016 | July   | 4.390   | 1003.993 | 568.667       | 0.983          | 98.290 |
| 20/07/2016 | July   | 4.871   | 889.239  | 533.500       | 0.986          | 98.571 |
| 21/07/2016 | July   | 4.445   | 939.747  | 524.333       | 0.984          | 98.429 |
| 22/07/2016 | July   | 4.458   | 918.721  | 547.333       | 0.985          | 98.500 |
| 23/07/2016 | July   | 4.894   | 907.367  | 545.333       | 0.985          | 98.500 |
| 24/07/2016 | July   | 5.704   | 1515.070 | 861.667       | 0.974          | 97.364 |
| 25/07/2016 | July   | 5.078   | 765.592  | 441.667       | 0.990          | 98.956 |
| 26/07/2016 | July   | 4.558   | 967.513  | 510.333       | 0.983          | 98.348 |
| 27/07/2016 | July   | 5.140   | 731.388  | 431.667       | 0.989          | 98.875 |
| 28/07/2016 | July   | 5.063   | 698.921  | 389.333       | 0.990          | 99.008 |
| 29/07/2016 | July   | 5.061   | 1393.957 | 708.000       | 0.977          | 97.707 |
| 30/07/2016 | July   | 4.595   | 1070.864 | 586.667       | 0.981          | 98.130 |
| 31/07/2016 | July   | 5.540   | 873.635  | 534.000       | 0.987          | 98.727 |
| 08/08/2016 | August | 4.853   | 1148.918 | 537.333       | 0.981          | 98.126 |
| 09/08/2016 | August | 5.107   | 1032.232 | 566.000       | 0.983          | 98.259 |
| 10/08/2016 | August | 5.047   | 837.209  | 524.333       | 0.987          | 98.665 |
| 11/08/2016 | August | 5.544   | 1667.186 | 918.667       | 0.970          | 97.027 |
| 13/08/2016 | August | 5.173   | 968.854  | 540.667       | 0.984          | 98.377 |

|            |           |       |          |         |       |        |
|------------|-----------|-------|----------|---------|-------|--------|
| 15/08/2016 | August    | 5.029 | 828.607  | 484.000 | 0.987 | 98.729 |
| 16/08/2016 | August    | 5.127 | 1272.575 | 698.667 | 0.978 | 97.797 |
| 17/08/2016 | August    | 4.534 | 827.134  | 454.667 | 0.986 | 98.627 |
| 18/08/2016 | August    | 4.719 | 1231.400 | 614.500 | 0.979 | 97.906 |
| 19/08/2016 | August    | 4.604 | 1197.655 | 549.000 | 0.980 | 98.038 |
| 20/08/2016 | August    | 4.776 | 769.431  | 444.000 | 0.988 | 98.764 |
| 21/08/2016 | August    | 4.597 | 1220.272 | 543.333 | 0.980 | 97.991 |
| 22/08/2016 | August    | 4.619 | 1586.372 | 729.667 | 0.974 | 97.393 |
| 23/08/2016 | August    | 4.602 | 1099.142 | 532.000 | 0.981 | 98.126 |
| 24/08/2016 | August    | 5.028 | 1372.590 | 696.667 | 0.976 | 97.620 |
| 25/08/2016 | August    | 4.582 | 1319.198 | 565.000 | 0.979 | 97.916 |
| 26/08/2016 | August    | 4.401 | 1009.029 | 496.000 | 0.983 | 98.298 |
| 27/08/2016 | August    | 4.715 | 1169.571 | 570.833 | 0.980 | 98.009 |
| 28/08/2016 | August    | 4.592 | 1069.230 | 536.500 | 0.981 | 98.125 |
| 29/08/2016 | August    | 4.651 | 1158.798 | 508.500 | 0.982 | 98.218 |
| 30/08/2016 | August    | 4.183 | 1034.337 | 453.667 | 0.984 | 98.365 |
| 31/08/2016 | August    | 4.917 | 1185.976 | 559.000 | 0.981 | 98.072 |
| 01/08/2016 | August    | 5.211 | 1330.252 | 700.667 | 0.978 | 97.766 |
| 02/08/2016 | August    | 4.899 | 1110.422 | 583.333 | 0.981 | 98.090 |
| 03/08/2016 | August    | 5.016 | 831.902  | 412.667 | 0.989 | 98.870 |
| 04/08/2016 | August    | 4.718 | 551.565  | 336.000 | 0.992 | 99.193 |
| 05/08/2016 | August    | 5.079 | 1675.116 | 836.667 | 0.971 | 97.098 |
| 06/08/2016 | August    | 5.584 | 1700.250 | 907.333 | 0.970 | 97.009 |
| 07/08/2016 | August    | 5.394 | 1098.419 | 624.667 | 0.982 | 98.186 |
| 01/09/2016 | September | 4.516 | 1081.610 | 498.667 | 0.982 | 98.246 |
| 02/09/2016 | September | 4.582 | 1351.799 | 571.667 | 0.978 | 97.837 |
| 03/09/2016 | September | 4.175 | 1142.402 | 488.000 | 0.982 | 98.167 |
| 04/09/2016 | September | 4.955 | 1566.092 | 741.667 | 0.973 | 97.337 |
| 05/09/2016 | September | 4.422 | 1400.603 | 599.000 | 0.978 | 97.751 |
| 06/09/2016 | September | 4.554 | 1239.060 | 587.667 | 0.979 | 97.905 |
| 07/09/2016 | September | 5.148 | 1460.947 | 679.000 | 0.975 | 97.514 |
| 08/09/2016 | September | 4.908 | 1372.419 | 658.667 | 0.977 | 97.683 |
| 09/09/2016 | September | 4.336 | 1215.225 | 503.333 | 0.981 | 98.076 |
| 10/09/2016 | September | 4.539 | 1095.600 | 504.000 | 0.982 | 98.188 |
| 11/09/2016 | September | 3.857 | 985.095  | 437.667 | 0.984 | 98.388 |
| 12/09/2016 | September | 4.731 | 1587.578 | 657.333 | 0.975 | 97.525 |

**Table S5.** Average relative abundance (%) of the OTUs throughout the season.

| OTU                 | Relative abundance (%) | OTU               | Relative abundance (%) |
|---------------------|------------------------|-------------------|------------------------|
| <i>Cladosporium</i> | 20.177                 | <i>Gibberella</i> | 0.334                  |
| <i>Alternaria</i>   | 9.88                   | <i>Ustilago</i>   | 0.269                  |



|                         |       |                         |       |
|-------------------------|-------|-------------------------|-------|
| <i>Myrothecium</i>      | 7.312 | <i>Pleospora</i>        | 0.231 |
| Ascomycota              | 7.026 | <i>Acremonium</i>       | 0.225 |
| <i>Epicoccum</i>        | 5.787 | Saccharomycetaceae      | 0.223 |
| Basidiomycota           | 5.292 | <i>Aureobasidium</i>    | 0.204 |
| Sporidiobolales         | 5.154 | <i>Tilletia</i>         | 0.195 |
| Sordariomycetes         | 4.448 | Exobasidiomycetes       | 0.174 |
| <i>Davidiella</i>       | 4.299 | Agaricomycetes          | 0.164 |
| Russulaceae             | 2.727 | <i>Dissoconium</i>      | 0.15  |
| <i>Leptosphaerulina</i> | 2.333 | <i>Emericella</i>       | 0.147 |
| Entylomatales           | 1.852 | <i>Periconia</i>        | 0.144 |
| <i>Pyricularia</i>      | 1.574 | <i>Eurotium</i>         | 0.142 |
| <i>Auriculibuller</i>   | 1.516 | <i>Vuilleminia</i>      | 0.134 |
| Pleosporales            | 1.357 | Polyporaceae            | 0.134 |
| others                  | 1.332 | <i>Pseudozyma</i>       | 0.13  |
| <i>Sporobolomyces</i>   | 0.975 | <i>Plectosphaerella</i> | 0.13  |
| Tremellaceae            | 0.88  | <i>Penicillium</i>      | 0.13  |
| <i>Lewia</i>            | 0.673 | Tremellales             | 0.124 |
| <i>Bipolaris</i>        | 0.568 | <i>Limonomyces</i>      | 0.12  |
| <i>Uromyces</i>         | 0.544 | Eurotiomycetes          | 0.118 |
| <i>Hyphodontia</i>      | 0.527 | Tremellomycetes         | 0.115 |
| <i>Fusarium</i>         | 0.516 | Xylariales              | 0.115 |
| Polyporales             | 0.502 | <i>Chalastospora</i>    | 0.115 |
| <i>Schizophyllum</i>    | 0.497 | <i>Udeniomyces</i>      | 0.11  |
| <i>Corioloropsis</i>    | 0.488 | <i>Bullera</i>          | 0.109 |
| <i>Aspergillus</i>      | 0.46  | <i>Nigrospora</i>       | 0.101 |
| Sclerotiniaceae         | 0.451 | <i>Monographella</i>    | 0.096 |
| Pezizomycetes           | 0.412 | <i>Cercospora</i>       | 0.094 |
| <i>Melampsora</i>       | 0.388 | <i>Phoma</i>            | 0.094 |
| <i>Phellinus</i>        | 0.346 | <i>Khuskia</i>          | 0.086 |
| <i>Cryptococcus</i>     | 0.339 | Corticaceae             | 0.078 |

---

**Table S6.** Identification of the oligotypes of *Pyricularia* and *Bipolaris* showing the BLASTn results the percentage of similarity and the GenBank accession numbers of the most similar sequences.

| OLIGOTYPING | BLAST RESULTS                                                                                                                                                                                                                     | SIMILARITY | GENBANK ACCESSION NUMBER                                                                                                                |
|-------------|-----------------------------------------------------------------------------------------------------------------------------------------------------------------------------------------------------------------------------------|------------|-----------------------------------------------------------------------------------------------------------------------------------------|
| <b>Bip1</b> | <i>Bipolaris austrostipae</i> / <i>Bipolaris cynodontis</i> / <i>Bipolaris coffeana</i>                                                                                                                                           | 99%        | NR_147491/ HF934930/ HE792944                                                                                                           |
| <b>BIP2</b> | <i>B. austrostipae</i> / <i>B. cynodontis</i> / <i>B. coffeana</i>                                                                                                                                                                | 100%       | NR_147491/ HF934930/ HE792944                                                                                                           |
| <b>BIP3</b> | <i>Curvularia buchloes</i> / <i>Curvularia hawaiiensis</i> / <i>Curvularia spicifera</i> / <i>Bipolaris buchloes</i> / <i>Bipolaris maydis</i> / <i>Curvularia australiensis</i> / <i>Cochliobolus</i> sp./ <i>Curvularia</i> sp. | 99%        | NR_147487/ HG778990/ HG778989/ HG778989/<br>JN207242/ HF934914/ KJ909765/ KJ913699/ KC986957/<br>JN207283/ JN207258/ FJ235087/ JN207242 |
| <b>BIP4</b> | <i>C. buchloes</i> / <i>C. hawaiiensis</i> / <i>C. spicifera</i> / <i>B. buchloes</i> / <i>B. maydis</i> / <i>C. australiensis</i> / <i>Cochliobolus</i> sp./ <i>Cochliobolus</i> sp.                                             | 100%       | NR_147487/ HG778990/ HG778989/ HG778989/<br>JN207242/ HF934914/ KJ909765/ KJ913699/ KC986957/<br>JN207283/ JN207258/ FJ235087/ JN207242 |
| <b>BIP5</b> | <i>C. buchloes</i> / <i>C. hawaiiensis</i> / <i>C. spicifera</i> / <i>B. buchloes</i> / <i>B. maydis</i> / <i>C. australiensis</i> / <i>Cochliobolus</i> sp./ <i>Cochliobolus</i> sp.                                             | 100%       | NR_147487/ HG778990/ HG778989/ HG778989/<br>JN207242/ HF934914/ KJ909765/ KJ913699/ KC986957/<br>JN207283/ JN207258/ FJ235087/ JN207242 |
| <b>BIP6</b> | <i>C. buchloes</i> / <i>C. hawaiiensis</i> / <i>C. spicifera</i> / <i>B. buchloes</i> / <i>B. maydis</i> / <i>C. australiensis</i> / <i>Cochliobolus</i> sp./ <i>Cochliobolus</i> sp.                                             | 100%       | NR_147487/ HG778990/ HG778989/ HG778989/<br>JN207242/ HF934914/ KJ909765/ KJ913699/ KC986957/<br>JN207283/ JN207258/ FJ235087/ JN207242 |
| <b>BIP7</b> | <i>Curvularia inaequalis</i>                                                                                                                                                                                                      | 99%        | KX674660                                                                                                                                |
| <b>PYR1</b> | <i>Magnaporthe grisea</i>                                                                                                                                                                                                         | 99%        | DQ493955                                                                                                                                |
| <b>PYR2</b> | <i>Pyricularia oryzae</i>                                                                                                                                                                                                         | 99%        | KM816794                                                                                                                                |
| <b>PYR3</b> | <i>P. oryzae</i>                                                                                                                                                                                                                  | 99%        | KM816794                                                                                                                                |
| <b>PYR4</b> | <i>M. grisea</i>                                                                                                                                                                                                                  | 99%        | DQ493955                                                                                                                                |
| <b>PYR5</b> | <i>M. grisea</i>                                                                                                                                                                                                                  | 99%        | DQ493955                                                                                                                                |
| <b>PYR6</b> | <i>M. grisea</i>                                                                                                                                                                                                                  | 99%        | DQ493955                                                                                                                                |
| <b>PYR7</b> | <i>P. oryzae</i> / <i>P. grisea</i>                                                                                                                                                                                               | 99%        | JQ747492/ JF414841                                                                                                                      |
| <b>PYR8</b> | <i>M. grisea</i>                                                                                                                                                                                                                  | 99%        | DQ493955                                                                                                                                |

|              |                  |     |          |
|--------------|------------------|-----|----------|
| <b>PYR9</b>  | <i>M. grisea</i> | 99% | DQ493955 |
| <b>PYR10</b> | <i>P. oryzae</i> | 99% | KM816794 |
| <b>PYR11</b> | <i>P. oryzae</i> | 99% | KM816794 |
| <b>PYR12</b> | <i>M. grisea</i> | 99% | DQ493955 |
| <b>PYR13</b> | <i>M. grisea</i> | 99% | DQ493955 |
| <b>PYR14</b> | <i>M. grisea</i> | 99% | FN555109 |
| <b>PYR15</b> | <i>M. grisea</i> | 99% | DQ493955 |

**Table S7.** Correlation of Spearman between the *Pyricularia* oligotypes and the number of cells calculated with a qPCR with TaqMan probe designed by Su'udi et al. 2013. The table reports the rho value and the p-value of each correspondence.

| OLIGOTYPE    | IDENTIFICATION WITH BLASTN | RHO         | P-VALUE   |
|--------------|----------------------------|-------------|-----------|
| <b>Pyr1</b>  | <i>Magnaporthe grisea</i>  | <b>0.47</b> | 1.76e-05  |
| <b>Pyr2</b>  | <i>Pyricularia oryzae</i>  | 0.16        | 0.18      |
| <b>Pyr3</b>  | <i>P. oryzae</i>           | 0.08        | 0.49      |
| <b>PYR4</b>  | <i>M. grisea</i>           | 0.42        | 0.0002    |
| <b>PYR5</b>  | <i>M. grisea</i>           | 0.46        | 3.13e-05  |
| <b>PYR6</b>  | <i>M. grisea</i>           | 0.39        | 0.0006    |
| <b>PYR7</b>  | <i>P. oryzae/M. grisea</i> | 0.30        | 0.009     |
| <b>PYR8</b>  | <i>M. grisea</i>           | 0.49        | 7.592e-06 |
| <b>PYR9</b>  | <i>M. grisea</i>           | 0.56        | 1.342e-07 |
| <b>PYR10</b> | <i>P. oryzae</i>           | 0.33        | 0.003     |
| <b>PYR11</b> | <i>P. oryzae</i>           | 0.38        | 0.0007    |
| <b>PYR12</b> | <i>M. grisea</i>           | 0.36        | 0.001     |
| <b>PYR13</b> | <i>M. grisea</i>           | 0.47        | 2.117e-05 |
| <b>PYR14</b> | <i>M. grisea</i>           | 0.17        | 0.15      |
| <b>PYR15</b> | <i>M. grisea</i>           | 0.48        | 1.174e-05 |

**Publisher's Note:** MDPI stays neutral with regard to jurisdictional claims in published maps and institutional affiliations.

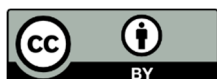

© 2020 by the authors. Submitted for possible open access publication under the terms and conditions of the Creative Commons Attribution (CC BY) license (<http://creativecommons.org/licenses/by/4.0/>).
